# Supplementary material for: Bioactive Bismuth Compounds: Is Their Toxicity a Barrier to Therapeutic Use?
Source: MDPI journal article supplement (doi:10.3390/ijms25031600), 2024-01-27
Supplement: s1 [file s1]

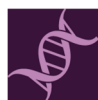

Supplementary Material

# Bioactive Bismuth Compounds: Is Their Toxicity a Barrier to Therapeutic Use?

Ângela Gonçalves <sup>1</sup>, Mariana Matias <sup>1</sup>, Jorge A. R. Salvador <sup>2,3</sup> and Samuel Silvestre <sup>1,3,\*</sup>

<sup>1</sup> CICS-UBI—Health Sciences Research Centre, University of Beira Interior, Av. Infante D. Henrique, 6201-506 Covilhã, Portugal; angela.goncalves@ubi.pt (Â.G.); mariana.matias@fcsaude.ubi.pt (M.M.)

<sup>2</sup> Laboratory of Pharmaceutical Chemistry, Faculty of Pharmacy, University of Coimbra, 3000-548 Coimbra, Portugal; salvador@ff.uc.pt

<sup>3</sup> CNC—Centre for Neuroscience and Cell Biology, University of Coimbra, 3004-517 Coimbra, Portugal

\* Correspondence: sms@ubi.pt

**Table S1.** Main pharmacological properties of bismuth compound according preclinical studies.

| Bismuth compound                                                                      | Main pharmacological properties                                                                                                                                                                                       | Reference |
|---------------------------------------------------------------------------------------|-----------------------------------------------------------------------------------------------------------------------------------------------------------------------------------------------------------------------|-----------|
| Bismuth(III) hydroxamate complexes                                                    | Antibacterial activity ( <i>Helicobacter pylori</i> )                                                                                                                                                                 | [44]      |
| Bismuth-fluoroquinolone complexes                                                     | Antibacterial activity ( <i>Helicobacter pylori</i> )                                                                                                                                                                 | [46]      |
| Bismuth(III) 5-sulfosalicylate complexes                                              | Antibacterial activity ( <i>Helicobacter pylori</i> )                                                                                                                                                                 | [47]      |
| Phenylbismuth(III) sulfonate complexes                                                | Antibacterial activity ( <i>Helicobacter pylori</i> )                                                                                                                                                                 | [48]      |
| Bismuth(III) flavonolate complexes                                                    | Antibacterial activity ( <i>Staphylococcus aureus</i> , methicillin-resistant <i>Staphylococcus aureus</i> , and vancomycin-resistant <i>Enterococcus</i> , <i>Escherichia coli</i> , <i>Pseudomonas aeruginosa</i> ) | [50]      |
| Di-aryl bismuth phosphinates                                                          | Antibacterial activity (methicillin-resistant <i>Staphylococcus aureus</i> , vancomycin-resistant <i>Enterococcus</i> )                                                                                               | [51]      |
| Bismuth thiolates                                                                     | Antibacterial activity (methicillin-resistant <i>Staphylococcus aureus</i> )                                                                                                                                          | [52]      |
| Bismuth nanoparticles                                                                 | Antibacterial activity ( <i>Helicobacter pylori</i> or <i>Streptococcus salivarius</i> and <i>Enterococcus faecalis</i> )                                                                                             | [45,53]   |
| Cyclic organobismuth, bearing a nitrogen or sulphur atom as an additional ring member | Antibacterial activity ( <i>Staphylococcus aureus</i> , <i>Bacillus subtilis</i> , and <i>Enterococcus faecalis</i> )                                                                                                 | [54]      |
| Bismuth(III) phenyl pyrazolines                                                       | Antibacterial ( <i>Bacillus licheniformis</i> and <i>Vibrio</i> spp) and antifungal ( <i>Aspergillus niger</i> and <i>Penicillium</i> )                                                                               | [55]      |

|                                                                          |                                                                                                                                                                                                                                                                                  |                 |
|--------------------------------------------------------------------------|----------------------------------------------------------------------------------------------------------------------------------------------------------------------------------------------------------------------------------------------------------------------------------|-----------------|
|                                                                          | <i>notatum</i> ) activities                                                                                                                                                                                                                                                      |                 |
| Bis(dialkyldithiocarbamate)diorganodithiophosphatobismuth(III) complexes | Antibacterial activity ( <i>Staphylococcus aureus</i> , <i>Escherichia coli</i> , <i>Pseudomonas aeruginosa</i> )                                                                                                                                                                | [56]            |
| Bismuth(III) salicylate and pyrazoline complexes                         | Antibacterial ( <i>Staphylococcus aureus</i> , <i>Bacillus licheniformis</i> , <i>Klebsiella pneumoniae</i> , <i>Vibrio</i> ssp, <i>Escherichia coli</i> , <i>Pseudomonas aeruginosa</i> ) and antifungal ( <i>Aspergillus niger</i> and <i>Penicillium notatum</i> ) activities | [57]            |
| Bismuth-norfloxacin complexes                                            | Antibacterial activity ( <i>Escherichia coli</i> , <i>Klebsiella pneumoniae</i> , <i>Staphylococcus aureus</i> , <i>Bacillus pumilis</i> and <i>Staphylococcus epidermidis</i> )                                                                                                 | [58]            |
| Triorganobismuth(V) biscalboxylates                                      | Antileishmanial activity ( <i>Leishmania tropica</i> )                                                                                                                                                                                                                           | [60]            |
| Triaryl bismuth dihalides and halobismuthanes                            | Antifungal activity ( <i>Saccharomyces cerevisiae</i> )                                                                                                                                                                                                                          | [61]            |
| Heterocyclicorganobismuth(I II) based on a diphenyl sulfone scaffold     | Antifungal activity ( <i>Saccharomyces cerevisiae</i> )                                                                                                                                                                                                                          | [62]            |
| Peptide–bismuth bicycles                                                 | Antiviral activity (Zika and West Nile)                                                                                                                                                                                                                                          | [63]            |
| Ranitidine bismuth citrate                                               | Antiviral activity (SARS-CoV-2)                                                                                                                                                                                                                                                  | [35]            |
| Bi-chlorodibenzo[ <i>c,f</i> ][1,5]thiabismocine                         | Anticancer activity                                                                                                                                                                                                                                                              | [66]            |
| Tris[2-( <i>N,N</i> -dimethylaminomethyl)phenyl]-bismuthane              | Anticancer activity                                                                                                                                                                                                                                                              | [67]            |
| Bismuth 8-quinolinethiolates                                             | Anticancer activity                                                                                                                                                                                                                                                              | [68]            |
| Bismuth(III) dithiocarbamate complexes                                   | Anticancer activity                                                                                                                                                                                                                                                              | [70]            |
| Bismuth citrate                                                          | Anticancer activity                                                                                                                                                                                                                                                              | [30]            |
| Bismuth subgallate                                                       | Anticancer activity                                                                                                                                                                                                                                                              | [72]            |
| Bismuth nanoparticles                                                    | Anticancer activity                                                                                                                                                                                                                                                              | [65, 69, 73–75] |
| Bismuth subsalicylate                                                    | Anti-Alzheimer's disease activity                                                                                                                                                                                                                                                | [85]            |
